# Supplementary material
Source: PubMed Central journal article supplement (PMC2753858)
Supplement: NIHMS141587-supplement-Fig_1_and_Table_1.pdf [file NIHMS141587-supplement-Fig_1_and_Table_1.pdf]

# Functional Roles for C5a Receptors in Sepsis

Daniel Rittirsch, Michael A. Flierl, Brian A. Nadeau, Danielle E. Day, Markus Huber-Lang, Carles R. Mackay, Firas S. Zetoune, Norma P. Gerard, Katherine Cianflone, Jörg Köhl, Craig Gerard, J. Vidya Sarma & Peter A. Ward

## Supplementary Figure 1

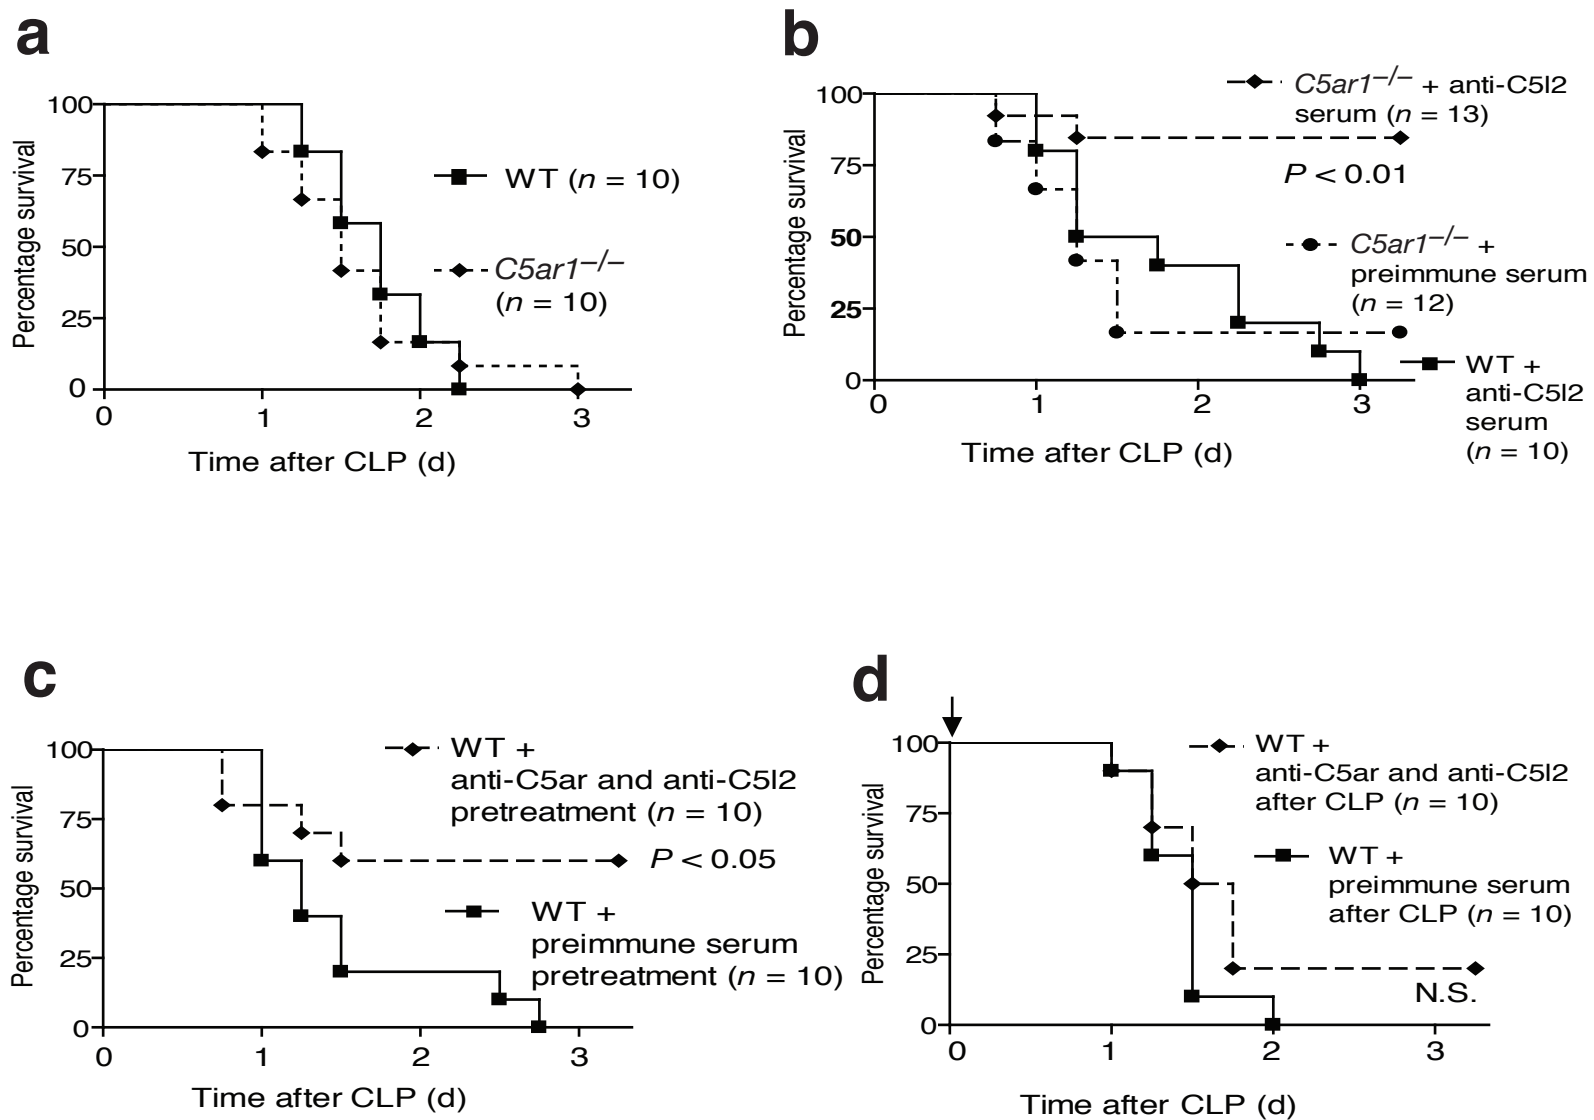

## Supplementary Figure 1

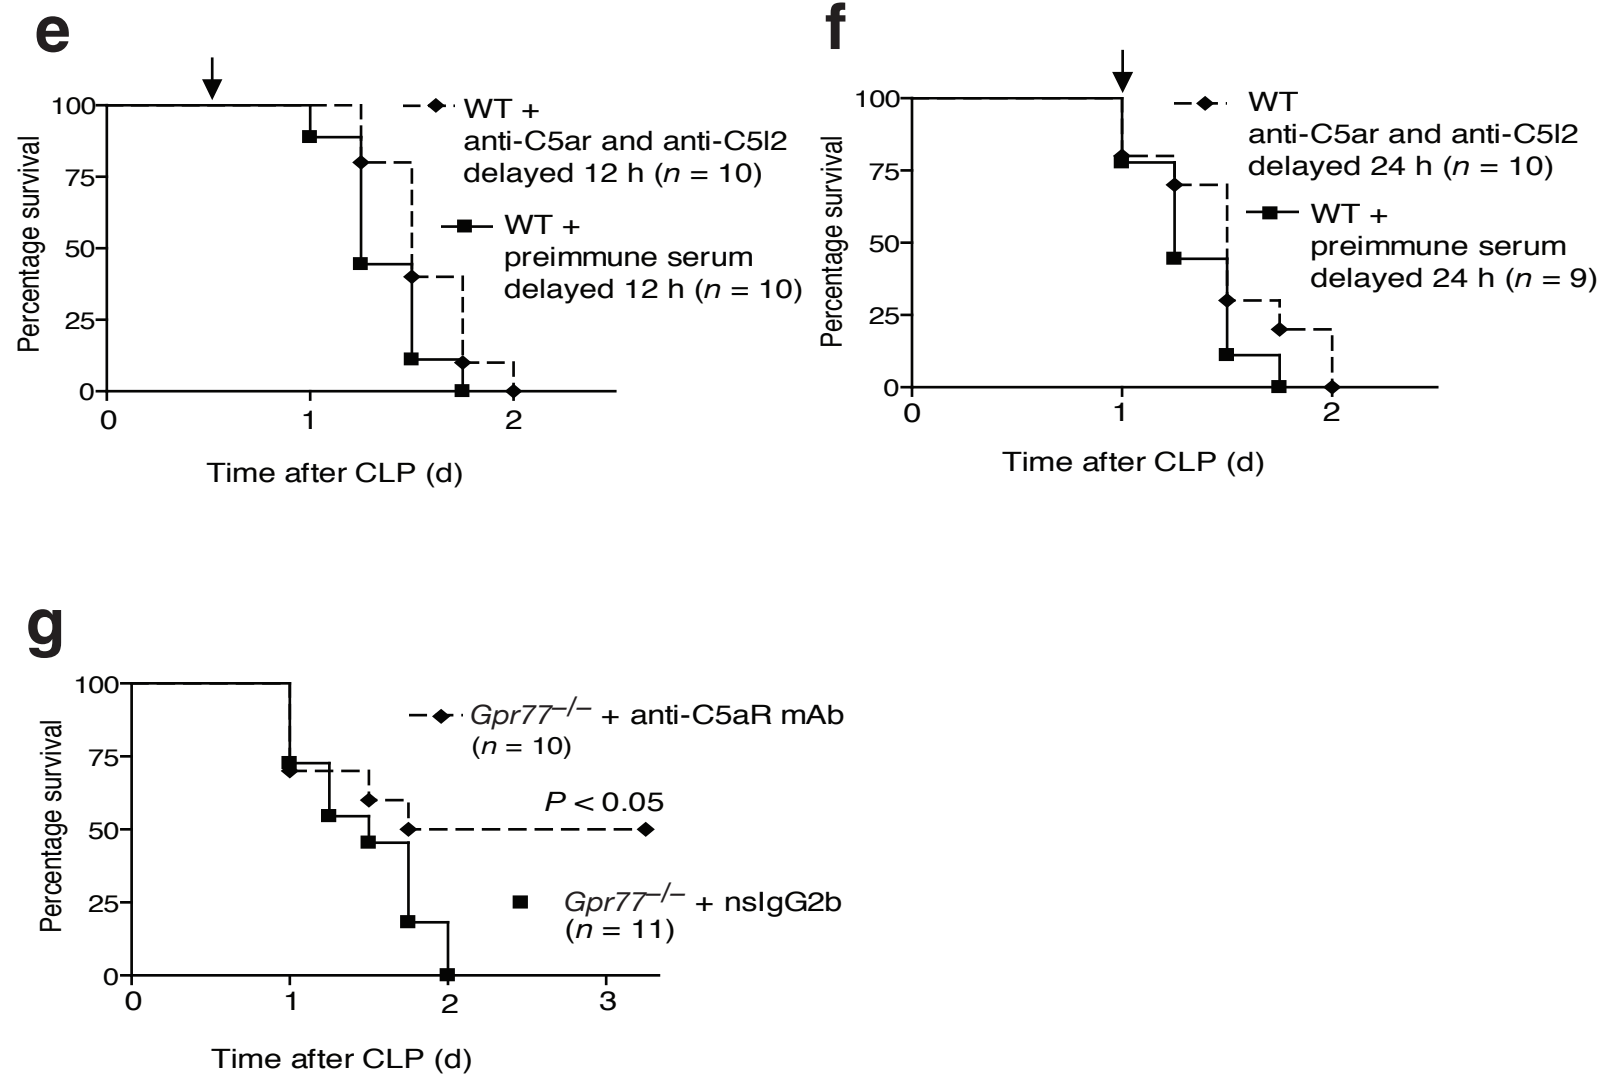

**Supplementary Figure 1** Additional survival curves for high-grade CLP. (a) Survival for severe sepsis in *C5ar1*-deficient mice. (b-g) Effect of combined blockade of C5ar and C5I2 on survival in severe sepsis. (b) Survival of *C5ar1*<sup>-/-</sup> mice treated with antiserum to C5I2 or preimmune serum or wild-type (WT) mice treated with C5I2-specific antiserum. (c) High-grade sepsis in wild-type mice pretreated with antiserum to C5ar and C5I2 or with preimmune serum. Mice received 1 ml C5ar- and C5I2-specific antiserum or preimmune serum by subcutaneous (s.c.) injection 12 h prior to CLP. (d) Dual blockade of C5a receptors in wild-type mice by treatment with combined antiserum to C5ar and C5I2 (1 ml s.c.) immediately post CLP. (e) Combined antibody-induced blockade of C5ar and C5I2 12 h after CLP (1 ml antiserum to C5ar and C5I2 s.c.). (f) Delayed treatment of wild-type mice with antiserum to C5ar and C5I2 (1 ml s.c.) 24 hr after CLP. Arrows indicate the time point of injection. (g) Survival in severe sepsis of *Gpr77*<sup>-/-</sup> mice treated with 100  $\mu$ g (200  $\mu$ l i.v.) mouse C5ar-specific monoclonal antibody (clone 20/70) or non-specific IgG (nslgG2b) immediately after sepsis induction by CLP. For each curve, the  $n$  value is given as are the corresponding  $P$  values.

**Supplementary Table 1.** Dose-response effects of MAPK / Akt inhibitors on C5a-induced HMGB1 release by *C5ar1*<sup>-/-</sup> macrophages

| Inhibitor             | Dose [ $\mu$ M] | % inhibition of HMGB1 release  |
|-----------------------|-----------------|--------------------------------|
| UO126 (MEK1/2)        | 50              | 2.2 ( $\pm$ 0.9) <sup>NS</sup> |
|                       | 100             | 65.0 ( $\pm$ 23.9) *           |
|                       | 200             | 100.0 ( $\pm$ 0.0) *           |
| SP600125 (JNK1/2)     | 1               | 0.2 ( $\pm$ 0.2) <sup>NS</sup> |
|                       | 5               | 72.1 ( $\pm$ 15.0) *           |
|                       | 10              | 92.4 ( $\pm$ 4.6) *            |
| SB203580 (p38)        | 10              | 1.1 ( $\pm$ 1.1) <sup>NS</sup> |
|                       | 50              | 1.5 ( $\pm$ 1.4) <sup>NS</sup> |
|                       | 100             | 1.0 ( $\pm$ 1.0) <sup>NS</sup> |
| Wortmannin (Akt/PI3K) | 0.1             | 68.9 ( $\pm$ 5.1) *            |
|                       | 0.5             | 58.8 ( $\pm$ 3.7) *            |
|                       | 1               | 81.3 ( $\pm$ 0.0) *            |

$n \geq 2$  for each group.

All *P* values are based on comparison to DMSO + C5a (50nM) positive controls.

\*  $P < 0.05$

NS = not significant
